# Supplementary material
Source: publisher figshare collection journal article supplement (https://karger.figshare.com/ndownloader/files/12678305)

## SUPPLEMENTARY MATERIAL

# **Microrna-224 Promotes Pancreatic Cancer Cell Proliferation and Migration by Targeting the TXNIP-Mediated HIF1 $\alpha$ Pathway**

Guanghui Zhu<sup>a,b,c</sup>    Lianming Zhou<sup>a</sup>    Haijun Liu<sup>a</sup>    Yuanzhou Shan<sup>a</sup>    Xueli Zhang<sup>a,b,c</sup>

<sup>a</sup>Department of General Surgery, Shanghai Fengxian District Central Hospital, Shanghai, <sup>b</sup>Department of General Surgery, Fengxian Hospital affiliated to Southern Medical University, Shanghai, <sup>c</sup>East China Normal University and Shanghai Fengxian District Central Hospital Joint Research Center for Translational Medicine, Shanghai, China

**Fig. S1. Effect of miR-224 or miR-224i transfection in pancreatic cells.** (A) Panc1 cells that were transfected with miR-224 mimetic (miR) were subjected to MTT (left) and BrdU (right) assays at the indicated time points for cell proliferation. (B) AsPc-1 cells that were transfected with miRNA-224 inhibitor (miRi) were subjected to MTT (left) and BrdU (right) assays at the indicated time points for cell proliferation.

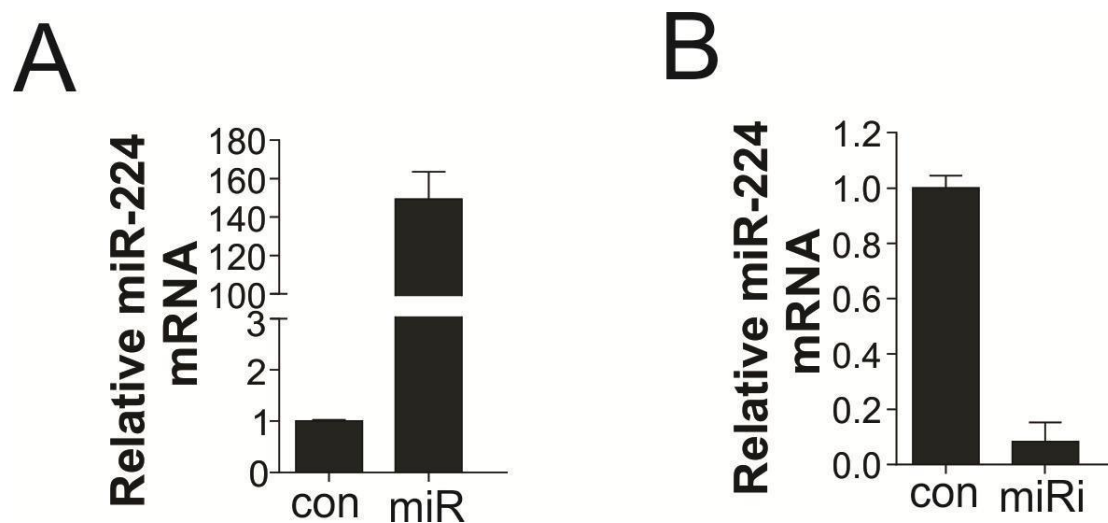

**Fig. S2. TXNIP mediates PDAC cells growth and migration.** (A) Panc1 cells were transfected with another TXNIP siRNA (siTXNIP2), and the expression of the indicated proteins was analyzed by western blotting. (B) The proliferation of Panc1 cells treated as in (A) was tested by MTT (left) and BrdU (right) assays at 48 h. (C) The migration of Panc1 cells treated as in (A) was tested by Transwell assays.

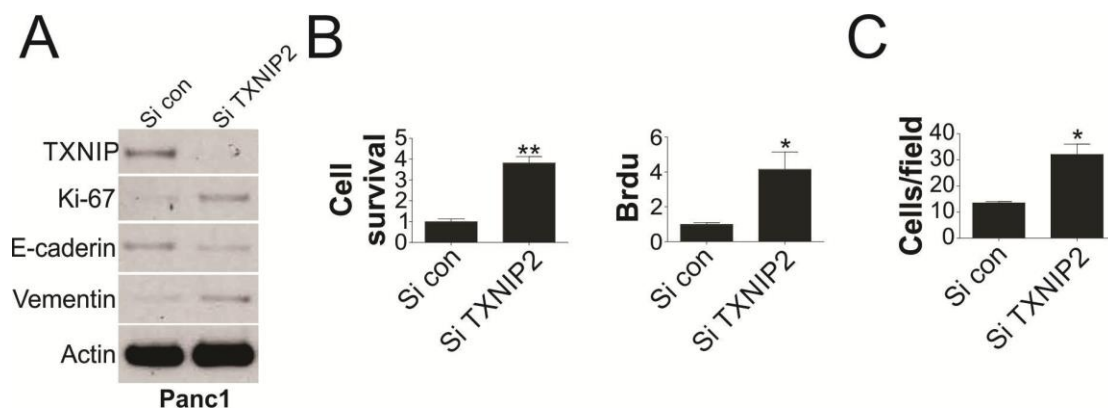

**Fig. S3. HIF1 $\alpha$  is essential for PDAC cell proliferation and migration.** (A) Panc1 cells were co-transfected with miR and another HIF1 $\alpha$  siRNA (siHIF1 $\alpha$ 2), and the knockdown effect of HIF1 $\alpha$  was verified by western blotting. (B) The proliferation of Panc1 cells treated as in (A) was tested by MTT (left) and BrdU (right) assays at 48 h. (C) The migration of Panc1 cells treated as in (A) was tested by Transwell assays.

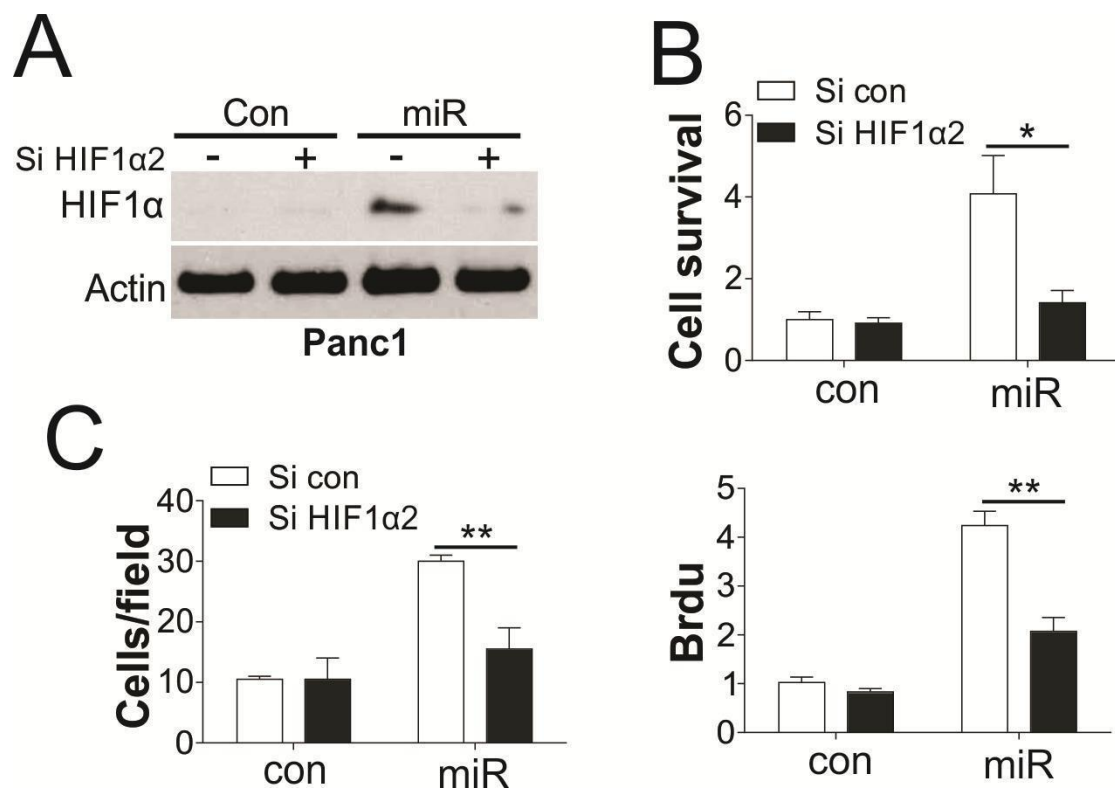

Supplement: Supplementary file 1 [file 12678305]
